# Supplementary material
Source: publisher figshare collection journal article supplement (https://karger.figshare.com/ndownloader/files/28323183)
Supplement: Supplementary file 1 [file 28323183]

**Table S1.** PCR Primers.

| Primer | Sequence (5’ to 3’) |
| --- | --- |
| Operon Forward | CGTGGAAAATAGGACTAAAAT AGCAGGG |
| A Reverse | CCCTTTTTTACGGATCCCCTCAATATGACT |
| A Forward | CGAACTTCGGTGTTACTATCACTC |
| B Reverse | CCTTTAACTCCAGCAAGTGCTTCCA |
| B Forward | TTGATGGGGCCAAGGAAACTGGTAAAACT |
| Alpha UpS Reverse | GCAACGAAATCCCCCAAGATAATGATACC |
| Alpha UpS Forward | TGAAACTGGTGTCGTTACCTATATCG |
| Alpha DnS Reverse | CTGTGATTGAGATAACGTTTGTTGCG |
| Alpha MdS Forward | GGGATGTCTTCTATCTCCACTCACGTC |
| Gamma US Reverse | GGCTCCTGTGATCTGACTCGTTTTC |
| Alpha DnS Forward | CTATTCGTACGACTAAGGATCTTCC |
| Gamma DnS Reverse | CACTTGCACCACCAACAATTTCAG |
| Gamma Forward | GATGCCAAAACAGCTGAGCACGCA |
| Beta Reverse | GTCAAACCAGTAAGAGCAACACGC |
| Beta Forward | GTGTTGGTGAACGTACACGTGAAGG |
| Operon Reverse | CCCCCAAGGTTACTAAACGAGCACT |
